# Supplementary material for: Thermochemistry of the smallest QOOH radical from the roaming fragmentation of energy selected methyl hydroperoxide ions
Source: Royal Society of Chemistry journal article supplement (doi:10.1039/c8cp03168a), 2018-01-01
Supplement: c8cp03168a1.pdf [file c8cp03168a1.pdf]

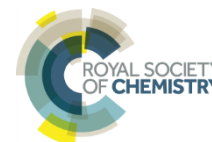

## Physical Chemistry Chemical Physics

### Supporting Information

## Thermochemistry of the Smallest QOOH Radical from the Roaming Fragmentation of Energy Selected Methyl Hydroperoxide Ions

Kyle Covert,<sup>a</sup> Krisztina Voronova,<sup>a</sup> Krisztián Torma,<sup>a</sup> Andras Bodi,<sup>b</sup> Judit Zádor,<sup>c,\*</sup> Bálint Sztáray<sup>a,\*</sup>

<sup>a</sup>Department of Chemistry, University of the Pacific, Stockton, California, USA

<sup>b</sup>Laboratory of Synchrotron Radiation and Femtochemistry, Paul Scherrer Institute, Villigen, Switzerland

<sup>c</sup>Combustion Research Facility, Sandia National Laboratories, Livermore, California, USA

\*Corresponding authors. E-mail: jzador@sandia.gov and bsztaray@pacific.edu.

### Contents

- **SI–1.** Cartesian coordinates (Å) and frequencies (cm<sup>-1</sup>) of the structures shown in Fig. 4 of the main text
- **SI–2.** Potential energy along the direct dissociation channels of CH<sub>3</sub>OOH<sup>+</sup> and details of the related VRC-TST calculations
- References in SI

### SI–1. Cartesian coordinates (Å) and harmonic vibrational frequencies (cm<sup>-1</sup>) of the structures shown in Fig. 4 of the main text

All structures are determined at the M06-2X/MG3S level of theory, unless otherwise stated.

#### CH<sub>3</sub>OOH<sup>+</sup>

|   |           |           |           |
|---|-----------|-----------|-----------|
| C | -0.002984 | -0.008435 | -0.053609 |
| O | 0.102482  | -0.084886 | 1.399874  |
| O | 1.324637  | 0.091764  | 1.786308  |
| H | 1.295204  | 0.007491  | 2.769286  |
| H | 0.526084  | 0.886500  | -0.375866 |
| H | 0.456133  | -0.919204 | -0.442254 |
| H | -1.072899 | 0.026770  | -0.227988 |
|   | 29.1951   | 483.6923  | 606.2834  |
|   | 828.5928  | 1113.9179 | 1148.7260 |
|   | 1330.6078 | 1422.6025 | 1452.1987 |
|   | 1462.8266 | 1509.9920 | 3062.8506 |
|   | 3168.7436 | 3226.8508 | 3568.4040 |

#### CH<sub>3</sub>OOH<sup>+</sup> conformer

|   |           |           |           |
|---|-----------|-----------|-----------|
| C | -0.021220 | 0.016013  | -0.031707 |
| O | 0.039240  | 0.097273  | 1.425486  |
| O | 1.206669  | -0.008319 | 1.959336  |
| H | 1.895483  | -0.132156 | 1.260508  |
| H | 0.572434  | 0.841997  | -0.427463 |
| H | 0.359029  | -0.966259 | -0.317797 |
| H | -1.078306 | 0.127516  | -0.250273 |
|   | 67.1032   | 473.2391  | 517.1296  |
|   | 850.3549  | 1108.6628 | 1165.1656 |

|  |           |           |           |
|--|-----------|-----------|-----------|
|  | 1328.0551 | 1429.9802 | 1461.9889 |
|  | 1465.9113 | 1492.1280 | 3052.4757 |
|  | 3155.8766 | 3216.2940 | 3525.1232 |

#### [CH<sub>2</sub>O...H<sub>2</sub>O]<sup>+</sup>

|   |           |           |           |
|---|-----------|-----------|-----------|
| C | 0.000737  | 0.003475  | -0.000618 |
| O | 0.002829  | -0.023512 | 1.202945  |
| O | 2.083125  | -0.015558 | 1.656387  |
| H | 2.155370  | 0.747814  | 2.250859  |
| H | 0.937889  | 0.024461  | -0.571840 |
| H | -0.979643 | 0.006213  | -0.503446 |
| H | 2.168886  | -0.803448 | 2.216055  |
|   | 212.1816  | 241.6769  | 320.5458  |
|   | 373.9409  | 516.6394  | 611.5874  |
|   | 1094.1646 | 1182.9454 | 1397.3732 |
|   | 1604.2922 | 1722.0921 | 2972.7328 |
|   | 3102.3353 | 3731.8144 | 3840.9237 |

#### [CH<sub>2</sub>OH...OH]<sup>+</sup>

|   |           |           |           |
|---|-----------|-----------|-----------|
| C | 0.007896  | 0.000001  | 0.014667  |
| O | 0.016059  | -0.000006 | 1.244733  |
| H | 0.939252  | -0.000009 | -0.554296 |
| H | -0.961698 | 0.000018  | -0.479889 |
| H | 0.958546  | -0.000022 | 1.707461  |
| O | 2.322841  | -0.000044 | 2.238538  |
| H | 2.482606  | -0.000050 | 3.204583  |
|   | 139.4143  | 159.8340  | 346.8488  |
|   | 355.9676  | 507.5663  | 1209.2487 |
|   | 1231.3247 | 1264.9931 | 1502.6054 |
|   | 1518.1836 | 1753.7538 | 2413.6618 |
|   | 3099.2929 | 3236.4984 | 3691.2243 |

**[HCO...H<sub>3</sub>O]<sup>+</sup>**

|   |           |           |           |
|---|-----------|-----------|-----------|
| C | -0.000177 | 0.000131  | -0.001229 |
| O | 0.003238  | -0.009860 | 1.158789  |
| O | 2.536676  | -0.002435 | -1.026853 |
| H | 1.536470  | -0.004365 | -0.643573 |
| H | -0.889578 | 0.013498  | -0.670528 |
| H | 3.020865  | -0.827865 | -0.850081 |
| H | 3.055980  | 0.771917  | -0.747950 |
|   |           |           |           |
|   | 55.7697   | 128.3581  | 293.6109  |
|   | 390.2926  | 539.6511  | 661.8329  |
|   | 1005.8922 | 1088.4077 | 1611.6462 |
|   | 1625.5956 | 2005.9279 | 2110.2849 |
|   | 2857.5848 | 3703.5817 | 3787.2640 |

**[HCO...H<sub>3</sub>O]<sup>+</sup> conformer**

|   |           |           |           |
|---|-----------|-----------|-----------|
| C | -0.003154 | 0.034484  | -0.000849 |
| O | 0.002289  | -0.034955 | 1.182400  |
| O | 1.922205  | -0.002717 | 2.710006  |
| H | 1.088690  | -0.016013 | 2.034918  |
| H | 2.050314  | -0.826223 | 3.207394  |
| H | 1.948812  | 0.766421  | 3.301349  |
| H | -0.901826 | 0.015216  | -0.645015 |
|   |           |           |           |
|   | 49.0567   | 141.3610  | 331.7394  |
|   | 425.6481  | 526.2876  | 543.0460  |
|   | 1108.9298 | 1175.4495 | 1615.0201 |
|   | 1697.8174 | 1884.8437 | 2154.9824 |
|   | 2951.5658 | 3742.8973 | 3821.6440 |

**[c-C(H<sub>2</sub>)OO(H)]<sup>+</sup>**

|   |           |           |           |
|---|-----------|-----------|-----------|
| C | 0.166539  | -0.040084 | 0.042389  |
| O | -0.018574 | -0.194287 | 1.401820  |
| O | 1.323230  | 0.122315  | 0.923230  |
| H | 1.481165  | 1.060584  | 1.184399  |
| H | 0.255783  | -0.947812 | -0.543807 |
| H | -0.195536 | 0.881832  | -0.400960 |
|   |           |           |           |
|   | 780.3845  | 902.3883  | 944.0649  |
|   | 1044.8779 | 1212.2655 | 1262.5185 |
|   | 1288.0224 | 1308.7057 | 1534.9622 |
|   | 3143.3694 | 3280.0374 | 3572.7141 |

**CH<sub>3</sub>OOH<sup>+</sup> ↔ [CH<sub>2</sub>O...H<sub>2</sub>O]<sup>+</sup> roaming (1e)****(at the MP2/6-311++G\*\* level)**

|   |           |           |           |
|---|-----------|-----------|-----------|
| C | 0.002083  | 0.004819  | 0.000141  |
| O | -0.011037 | 0.028127  | 1.270052  |
| O | 2.675412  | -0.105988 | -0.662771 |
| H | 3.346751  | -0.063133 | -1.368749 |
| H | 1.173824  | -0.040037 | -0.309579 |
| H | -0.445275 | -0.932505 | -0.406327 |
| H | -0.392926 | 0.949673  | -0.440342 |
|   |           |           |           |
|   | -433.8385 | 50.4221   | 134.1464  |
|   | 301.9980  | 434.0817  | 860.6389  |
|   | 892.3774  | 1022.0716 | 1115.1075 |
|   | 1283.2407 | 1417.1595 | 1629.1459 |
|   | 2845.9268 | 2934.7198 | 3754.1001 |

**CH<sub>3</sub>OOH<sup>+</sup> ↔ [CH<sub>2</sub>O...H<sub>2</sub>O]<sup>+</sup> (1f)**

|   |            |           |           |
|---|------------|-----------|-----------|
| C | -0.104079  | -0.120885 | 0.210843  |
| O | -0.256706  | 0.206209  | 1.509691  |
| O | 1.126042   | 0.268541  | 1.872237  |
| H | 1.283645   | -0.432695 | 2.546185  |
| H | 1.254116   | 0.129802  | 0.536437  |
| H | 0.276292   | -1.136594 | 0.012487  |
| H | -0.810414  | 0.340055  | -0.469574 |
|   |            |           |           |
|   | -1721.7931 | 458.9070  | 578.7971  |
|   | 697.2571   | 935.8030  | 987.7497  |
|   | 1058.4422  | 1138.2958 | 1213.6007 |
|   | 1347.9788  | 1466.3955 | 1682.1145 |
|   | 2980.0700  | 3236.5863 | 3589.3142 |

**CH<sub>3</sub>OOH<sup>+</sup> ↔ [CH<sub>2</sub>OH...OH]<sup>+</sup> (1g)**

|   |            |           |           |
|---|------------|-----------|-----------|
| C | -0.075543  | -0.116585 | 0.022172  |
| O | 0.127248   | 0.239005  | 1.395014  |
| O | 1.323585   | -0.335629 | 1.854253  |
| H | 1.365428   | 0.003142  | 2.769833  |
| H | 0.357584   | 1.069812  | 0.581160  |
| H | 0.672369   | -0.780944 | -0.389345 |
| H | -1.121686  | -0.041848 | -0.245762 |
|   |            |           |           |
|   | -1977.3350 | 302.4360  | 402.8962  |
|   | 442.3089   | 878.9118  | 912.1031  |
|   | 1025.8601  | 1108.0849 | 1169.7199 |
|   | 1402.6417  | 1500.2184 | 2208.5088 |
|   | 3145.5170  | 3319.8275 | 3703.9105 |

**[CH<sub>2</sub>O...H<sub>2</sub>O]<sup>+</sup> ↔ [HCO...H<sub>3</sub>O]<sup>+</sup>**

|   |           |           |           |
|---|-----------|-----------|-----------|
| C | -0.002618 | 0.000000  | -0.000798 |
| O | -0.004391 | 0.000000  | 1.183765  |
| O | 2.515765  | 0.000000  | 0.824904  |
| H | 3.060235  | 0.766402  | 1.042909  |
| H | 1.002435  | 0.000000  | -0.501550 |
| H | -0.962734 | 0.000000  | -0.558865 |
| H | 3.060235  | -0.766402 | 1.042909  |
|   |           |           |           |
|   | -199.8563 | 254.5346  | 275.1581  |
|   | 282.0735  | 385.8679  | 495.8514  |
|   | 853.5180  | 1129.7321 | 1231.8549 |
|   | 1647.2786 | 1720.0318 | 2707.0121 |
|   | 2930.1572 | 3800.0308 | 3896.4606 |

**[CH<sub>2</sub>OH...OH]<sup>+</sup> ↔ [CH<sub>2</sub>O...H<sub>2</sub>O]<sup>+</sup>**

|   |            |           |           |
|---|------------|-----------|-----------|
| H | 0.000000   | 0.000000  | 0.000000  |
| O | 0.000000   | 0.000000  | 1.067009  |
| O | 0.369719   | 0.000000  | -1.268284 |
| C | 1.577709   | 0.000000  | -1.235027 |
| H | 2.109437   | 0.000000  | -0.264169 |
| H | 2.130592   | 0.000000  | -2.187152 |
| H | -0.863387  | 0.000000  | 1.514584  |
|   |            |           |           |
|   | -1782.4760 | 108.1775  | 142.9442  |
|   | 425.1447   | 580.1565  | 786.0880  |
|   | 1137.6673  | 1189.4779 | 1404.3288 |
|   | 1419.8240  | 1478.7951 | 1792.5007 |
|   | 2932.3005  | 3068.5002 | 3771.1157 |

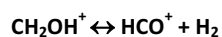

|   |            |           |           |
|---|------------|-----------|-----------|
| C | 0.165423   | 0.000004  | 0.138861  |
| O | -0.234284  | -0.000520 | 1.268948  |
| H | 1.402932   | -0.000575 | -0.042195 |
| H | -0.327953  | 0.000933  | -0.844008 |
| H | 1.137384   | -0.001088 | 0.951851  |
|   | -2240.4670 | 299.1773  | 1063.4181 |
|   | 1201.0050  | 1515.5645 | 1889.4368 |
|   | 2209.0450  | 2290.4366 | 3089.1214 |

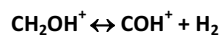

|   |            |           |           |
|---|------------|-----------|-----------|
| C | -0.000019  | -0.000001 | 0.000021  |
| O | 0.000046   | 0.000004  | 1.232220  |
| H | 1.377411   | 0.000003  | -0.268122 |
| H | 0.657566   | -0.000003 | -0.970297 |
| H | 0.812551   | 0.000010  | 1.783455  |
|   | -1795.5659 | 846.5086  | 921.5417  |
|   | 1006.8547  | 1224.5553 | 1573.5627 |
|   | 1910.4916  | 2651.0075 | 3590.1622 |

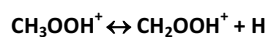

(at the M06-2X/6-311++G\*\* level)

|   |           |           |           |
|---|-----------|-----------|-----------|
| C | 0.000000  | 0.000000  | 0.000000  |
| O | 0.000000  | 0.000000  | 1.406852  |
| O | 1.251533  | 0.000000  | 1.735559  |
| H | 1.176686  | 0.000000  | 2.696669  |
| H | 0.492935  | 0.896090  | -0.385925 |
| H | 0.856796  | -1.557541 | -0.670796 |
| H | -1.052839 | 0.000000  | -0.281713 |
|   | -578.5919 | 219.4090  | 305.4380  |
|   | 454.1357  | 512.3021  | 820.2564  |
|   | 920.3706  | 1190.8196 | 1243.0296 |
|   | 1407.4290 | 1489.0438 | 1629.1707 |
|   | 3145.7283 | 3305.3691 | 3724.9259 |

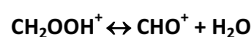

|   |            |           |           |
|---|------------|-----------|-----------|
| C | -0.022840  | 0.057019  | 0.009996  |
| O | -0.093740  | -0.247103 | 1.206045  |
| O | 1.406147   | -0.311725 | 1.517132  |
| H | 1.604282   | 0.326295  | 2.243844  |
| H | 1.444220   | 0.053411  | 0.371833  |
| H | -1.004546  | 0.122104  | -0.476648 |
|   | -1922.5596 | 458.9637  | 537.8613  |
|   | 871.4707   | 903.2206  | 1115.2099 |
|   | 1165.5177  | 1353.9123 | 1462.9819 |
|   | 1934.8784  | 3099.2141 | 3580.8743 |

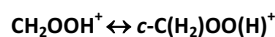

|   |           |           |           |
|---|-----------|-----------|-----------|
| C | 0.014906  | -0.144520 | 0.019576  |
| O | 0.007390  | -0.164128 | 1.322310  |
| O | 1.462027  | -0.148722 | 1.190216  |
| H | 1.663819  | 0.769118  | 1.470500  |
| H | 0.466591  | -0.973468 | -0.522046 |
| H | -0.526692 | 0.661752  | -0.482098 |
|   | -770.5986 | 552.5505  | 743.5465  |
|   | 948.2548  | 1208.6793 | 1246.2819 |

|  |           |           |           |
|--|-----------|-----------|-----------|
|  | 1340.4478 | 1434.7269 | 1561.9108 |
|  | 3085.0306 | 3237.5425 | 3660.6481 |

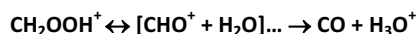

(CCSD(T)-F12 max energy structure along the triplet O-O bond breaking path)

|   |           |           |           |
|---|-----------|-----------|-----------|
| C | -0.422891 | 0.000001  | -1.222652 |
| O | 0.566567  | -0.000001 | -0.539712 |
| O | -0.182901 | -0.000001 | 1.524812  |
| H | 0.662122  | 0.000015  | 2.032151  |
| H | -1.429944 | 0.000002  | -0.781991 |
| H | -0.282921 | 0.000001  | -2.317412 |

n.a.

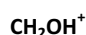

|   |           |           |           |
|---|-----------|-----------|-----------|
| C | 0.000179  | 0.000152  | -0.000025 |
| O | -0.000072 | -0.000410 | 1.239165  |
| H | 0.929350  | -0.000146 | -0.569933 |
| H | -0.978346 | 0.000954  | -0.476040 |
| H | 0.874797  | -0.001134 | 1.680872  |

|  |           |           |           |
|--|-----------|-----------|-----------|
|  | 1025.5485 | 1113.4142 | 1266.7308 |
|  | 1381.1429 | 1496.1364 | 1714.3991 |
|  | 3113.2403 | 3253.2288 | 3646.7628 |

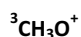

|   |           |           |           |
|---|-----------|-----------|-----------|
| C | -0.012538 | -0.021716 | -0.008866 |
| H | -0.014232 | -0.024651 | 1.116205  |
| H | 1.047624  | -0.024651 | -0.385486 |
| O | -0.622049 | -1.077420 | -0.439855 |
| H | -0.545160 | 0.894944  | -0.385486 |
|   | 842.0529  | 842.0600  | 1141.1774 |
|   | 1141.1781 | 1238.0495 | 1248.2855 |
|   | 2725.4872 | 2751.8354 | 2751.8367 |

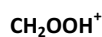

|   |           |           |           |
|---|-----------|-----------|-----------|
| C | 0.001315  | 0.000008  | 0.000870  |
| O | 0.003973  | -0.000004 | 1.236591  |
| O | 1.289485  | 0.000008  | 1.781805  |
| H | 1.094101  | -0.000005 | 2.738657  |
| H | 0.943493  | 0.000027  | -0.546940 |
| H | -0.989994 | 0.000000  | -0.446856 |
|   | 306.3033  | 519.4868  | 717.7419  |
|   | 939.9378  | 1199.7799 | 1248.4000 |
|   | 1428.7326 | 1499.1051 | 1721.8556 |
|   | 3112.2957 | 3260.5715 | 3713.2040 |

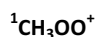

|   |           |           |           |
|---|-----------|-----------|-----------|
| C | 0.051653  | -0.026935 | -0.100503 |
| O | 0.305510  | -0.331108 | 1.325267  |
| O | 1.050709  | 0.369783  | 1.911146  |
| H | 0.639237  | 0.846784  | -0.363666 |
| H | 0.331773  | -0.959374 | -0.599508 |
| H | -1.034494 | 0.100850  | -0.130057 |
|   | 192.1249  | 549.2839  | 729.3612  |
|   | 1041.5559 | 1195.4668 | 1381.2969 |
|   | 1402.9831 | 1446.4367 | 1707.0523 |

|                              |           |           |           |
|------------------------------|-----------|-----------|-----------|
|                              | 3035.0938 | 3124.8044 | 3227.5765 |
| ${}^3\text{CH}_3\text{OO}^+$ |           |           |           |
| C                            | 0.004669  | -0.001274 | -0.168740 |
| O                            | 0.168704  | 0.002627  | 1.430620  |
| O                            | 1.253305  | 0.004047  | 1.932084  |
| H                            | 0.496982  | 0.921460  | -0.459357 |
| H                            | 0.497333  | -0.925215 | -0.454889 |
| H                            | -1.076606 | -0.001645 | -0.237039 |
|                              | 96.0182   | 328.2417  | 518.0732  |
|                              | 1062.9573 | 1096.7323 | 1396.5173 |
|                              | 1435.1990 | 1450.8976 | 1645.9003 |
|                              | 3098.5379 | 3249.5466 | 3265.2685 |

## SI-2. Potential energy along the direct dissociation channels of $\text{CH}_3\text{OOH}^+$ and details of the related VRC-TST calculations

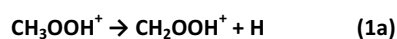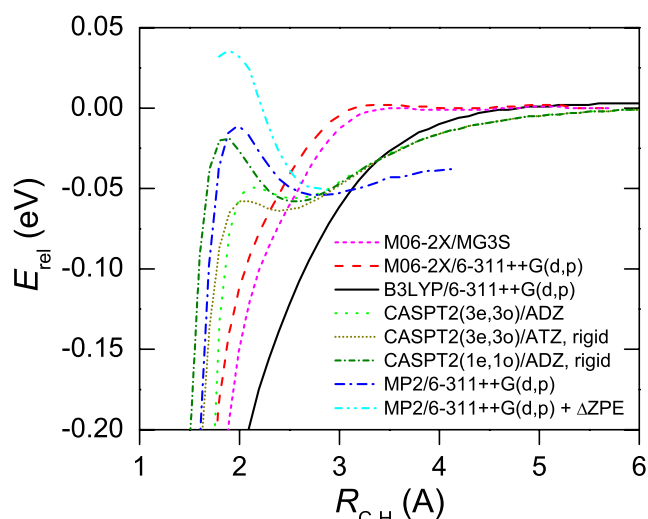

**Figure SI-2.1.** Energy profiles along the C–H bond in  $\text{CH}_3\text{OOH}^+$  at various levels of theory. All curves are fully relaxed and ZPE-exclusive, unless noted in the legend. The asymptote is the zero of energy.

This reaction is near barrierless at the M06-2X/MG3S and M06-2X/6-311++G(d,p) levels (there is a slight barrier at  $\sim 3.3$  Å), while it is barrierless at the B3LYP/6-311++G(d,p) one. With MP2/6-311++G(d,p) we found a barrier at  $\sim 2.0$  Å, where the barrier is correlated with the planar-to-tetrahedral geometry change along the C–H coordinate. Using CASPT2(3e,3o)/aug-cc-pVDZ we also found this saddle point at  $\sim 2.1$  Å (the active space consists of the  $\sigma$  and  $\sigma^*$  orbitals of the breaking bond and the HOMO). Such variations in the location of this very low barrier are not unexpected and the trends are similar to the findings of Harding *et al.*<sup>1</sup> for neutral species. Using the CASPT2(3e,3o)/aug-cc-pVTZ geometries and ZPE correction we calculated F12 energies for this small barrier and obtained  $-0.04$  eV, and remarkably, the CASPT2(3e,3o)/aug-cc-pVTZ value is also  $-0.04$  eV. These values in case of taking the MP2

geometries are  $-0.03$  and  $0.13$  eV, respectively. We expect no variational effects to play a role in this region based on the ZPE-corrected potential energy curve for MP2, because the ZPE-corrected maximum coincides with the electronic one along the path, and it is also above the asymptote.

The long-range part of the potential for channel 1a is largely invariant to basis set, active space, and geometry relaxation at the CASPT2 level. Therefore, we sampled the potential at the CASPT2(1e,1o)/aug-cc-pVDZ level between  $\sim 3.5$  and  $15$  Å C–H separation of the rigid fragments using overall  $\sim 4000$  sample points that converged the results to within 5%. At longer distances we only placed the pivot points on the center of mass of the fragments, while at closer separations we calculated fluxes with the pivot point being on the radical carbon atom. In the state counts we also accounted for the OH rotor, but not the C–O one. We found that rotation around the latter bond has a very high barrier and also leads to isomerization at energies higher than the experimental range.

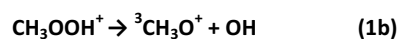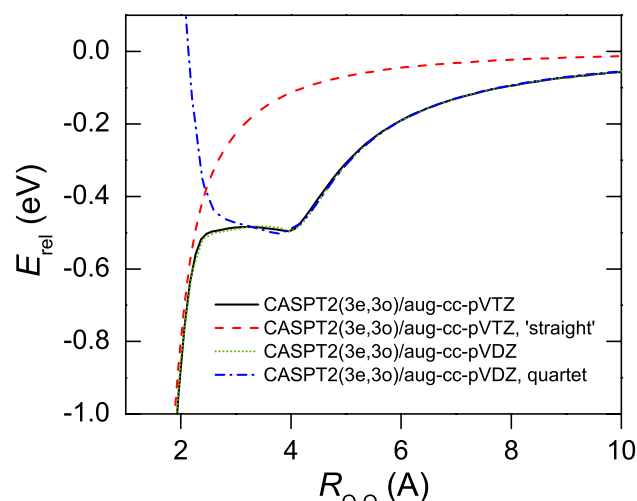

**Figure SI-2.2.** Energy profiles along the O–O bond in  $\text{CH}_3\text{OOH}^+$  at various levels of theory. All curves are fully relaxed and ZPE-exclusive. The asymptote is the zero of energy.

To account for the multireference character we calculated the energy along the breaking bond at the CASPT2(3e,3o)/aug-cc-pVTZ level of theory in  $C_s$  point group symmetry ( $A''$  state) shown in Fig. SI-2.2. The active space consisted of the radical orbital and the bonding and antibonding orbitals of the breaking bond, or, thinking in terms of the fragments, the radical orbital of the OH fragment and the two orbitals occupied by the unpaired electrons of the  ${}^3\text{CH}_3\text{O}^+$  located on its O atom. The product is  ${}^3\text{CH}_3\text{O}^+$  because the ZPE-exclusive asymptote at this level is  $3.04$  eV relative to  $\text{CH}_3\text{OOH}^+$  and is correlated with the triplet  ${}^3\text{CH}_3\text{O}^+ + \text{OH}$ , for which the ZPE-exclusive F12//M06-2X energy is  $3.10$  eV.  ${}^3\text{CH}_3\text{O}^+$  is a stable ion and isoelectronic with  $\text{O}_2$ ; the singlet state at the  ${}^3\text{CH}_3\text{O}^+$  geometry is much higher in energy and readily rearranges to  ${}^1\text{CH}_2\text{OH}^+$ . However, since  ${}^1\text{CH}_2\text{OH}^+$  is  $3.99$  eV more stable than  ${}^3\text{CH}_3\text{O}^+$ , it is likely that the latter also eventually forms  ${}^1\text{CH}_2\text{OH}^+$ , but in the mass spectrum

and breakdown curves the two species, if formed this way, are indistinguishable.

Without orbital symmetries we found that it is difficult to converge the doublet state for channel 1b. At the same time the corresponding quartet state, a state that is much easier to converge, becomes degenerate above  $\sim 3$  Å separation with the doublet one, and the geometry relaxation effects are also negligible in this region. Therefore, we sampled the interfragmental potential at the CASPT2(3e,3o)/aug-cc-pVDZ level of theory for the quartet state between 4 and 20 Å center-of-mass separation to variationally determine the bottleneck for this dissociation channel. We calculated  $\sim 6000$  points. Due to the spin-orbit coupling of the OH radical we also lowered the asymptote by 70  $\text{cm}^{-1}$  ( $\sim 0.009$  eV) but ignored the rovibronic correction for the OH state count that only affects the lowest  $\sim 0.1$  eV part of the kinetics.

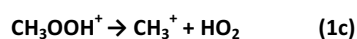

In addition to M06-2X/MG3S we also scanned this bond using MP2/6-311++G(d,p), and found no barrier either. We also found that above  $\sim 3.5$  Å, where the potential is already very attractive ( $-0.4$  eV), the fragment geometries are essentially the same as at large separation, demonstrated by the rigid CASPT2(1e,1o)/aug-cc-pVDZ scans, see SI-2.

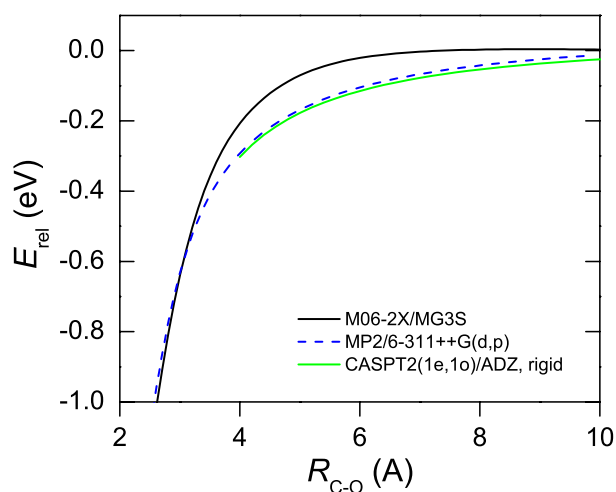

**Figure SI-2.3.** Energy profiles along the C–O bond in  $\text{CH}_3\text{OOH}^+$  at various levels of theory. All curves are fully relaxed and ZPE-exclusive, unless noted in the legend. The asymptote is the zero of energy.

For channel 1c we calculated the number of states using VRC-TST at the CASPT2(1e,1o)/aug-cc-pVDZ level without correcting for geometry relaxation effects. The CASPT2 energies are essentially the same as the MP2 ones in this case. We found that the results are fairly sensitive to the dividing surface optimization in this case, therefore, we sampled interfragmental distances between 2 and 20 Å and placed the pivot points on the center of masses of the two fragments, and at close distances also above and below the plane of

the methyl group at 0.4, 0.8, and 1.0 Å. In total we generated 51 dividing surfaces and  $\sim 17000$  samples.

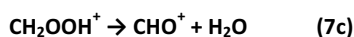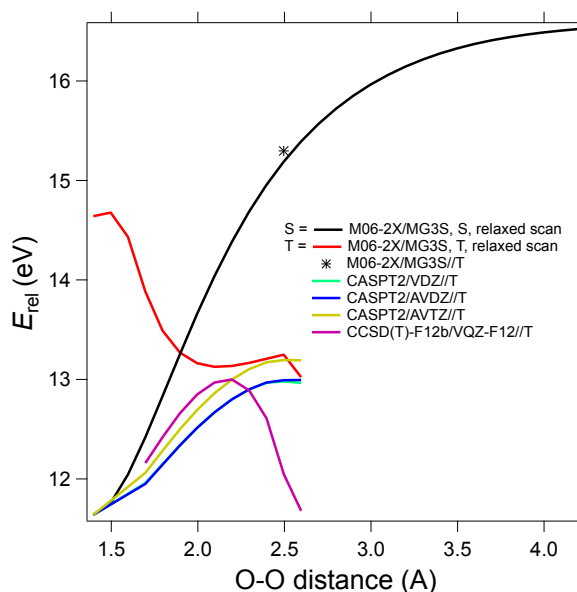

**Figure SI-2.4.** Energy profiles along the O–O bond in  $\text{CH}_2\text{OOH}^+$  at various levels of theory. All curves are ZPE-exclusive, and the energies are shown relative to the neutral  $\text{CH}_2\text{OOH}$ . S: geometries along the singlet scan (the OH moiety simply goes away); T: geometries along the triplet scan (the OH moiety stays close to the  $\text{CH}_2\text{O}$  part and abstracts an H).

## References in SI

1. L. B. Harding, S. J. Klippenstein, and A. W. Jasper, *Phys. Chem. Chem. Phys.* 2007, **9**, 4055.
